# Supplementary material for: Improving deconvolution methods in biology through open innovation competitions: an application to the connectivity map
Source: PubMed Central journal article supplement — Bioinformatics. 2021 Mar 22;37(18):2889–95. doi: 10.1093/bioinformatics/btab192 (PMC8479655; doi:10.1093/bioinformatics/btab192), 2021-03-22
Supplement: btab192_supplementary_data.pdf [file btab192_supplementary_data.pdf]

# Supplementary Material: Improving Deconvolution Methods in Biology through Open Innovation Competitions: An Application to the Connectivity Map

March 16, 2021

## A Supplementary Material

### A.1 Clustering by method and perturbation type

The goal of this section is to provide a high-level overview of the differences in the deconvolution data (DECONV) and the corresponding differential expression (DE) generated for each solution.

We used a t-SNE projection of the samples generated by UNI and by applying a deconvolution algorithm to DUO data. t-SNE was run twice and separately for the deconvolution (DECONV) and differential-expression (DE) data; on the holdout datasets only. In both cases, the corresponding UNI or ground-truth (GT) data was included as well.

Results show that the DECONV data clusters well by perturbation type (Fig. 1, **a**), reflecting the different nature of the shRNA and compound treatments. Deconvolution algorithms in the same class also tend to have similar values (Fig. 1, **c**). For example, the points for the decision tree regressor (DTR) algorithms overlap substantially in the projection, as do the k-means and Gaussian mixture model (GMM) algorithms. However, after the transformation to DE data, the t-SNE projection is more homogenous, with no particular clustering by perturbation and algorithm type (Fig. 1, **b**).

While it can be hard to interpret the clustering at the DECONV level without further analysis, the lack of clustering by algorithm in DE space suggests that there are no global biases introduced by algorithm type. This is reassuring because it means that each approach could be considered a viable solution and the outputs of each are likely to be interoperable in the downstream analysis.

[Figure 1 about here.]

## A.2 List of compound treatments

This table shows compound perturbation names (`pert_iname`), unique id (`pert_id`), time of treatment (`pert_itime`), dose (`pert_idose`), and number of replicates (`num_replicates`).

[Table 1 about here.]

## A.3 List of Short-hairpin (shRNA) treatments

This table shows shRNA perturbation names (`pert_iname`), unique id (`pert_id`), and number of replicates (`num_replicates`).

[Table 2 about here.]

## A.4 Data availability and implementation

- The contest data are available in the Clue.io data library [https://clue.io/data/CT#CT\\_DPEAK](https://clue.io/data/CT#CT_DPEAK).
- The source codes of the solutions along with Docker containers that include all the dependencies needed to run the codes are available in the CMap Github repository [https://github.com/cmap/gene\\_deconvolution\\_challenge](https://github.com/cmap/gene_deconvolution_challenge)
- A Docker container used for converting the deconvolution data to differential expression values is available in the Docker Hub [https://hub.docker.com/r/cmap/sig\\_2to4\\_tool](https://hub.docker.com/r/cmap/sig_2to4_tool).
- A collection of scripts in the language R used to generate tables and figures are available in the CMap Github repository <https://github.com/cmap/deconv>.

## A.5 Scoring function

This appendix describes the scoring function used in the contest to evaluate the performance of the competitors' submissions.

Submissions were scored based on a scoring function that combines measures of accuracy and computational speed. Accuracy measures were obtained by comparing the contestant's predictions, which were derived from *DUO* data, to the equivalent *UNI* ground truth data generated from the same samples.

The scoring function combines two measures of accuracy: correlation and AUC, which are applied to deconvoluted (*DECONV*) data and one to differential expression (*DE*) data, respectively.

*DE* is derived from *DECONV* by applying a series of transformations (parametric scaling, quantile normalization, and robust z-scoring) that are described in detail in Subramanian *et al.* (2017). The motivation for scoring *DE* data in addition to *DECONV* is because it is at this level where the most biologically interesting gene expression changes are observed. Of particular interest is obtaining significant improvement in the detection of, so called, “extreme modulations.” These are genes that notably up- or down-regulated by perturbation and hence exhibit an exceedingly high (or low) *DE* values relative to a fixed threshold.

The first accuracy component is based on the Spearman rank correlation between the predicted *DECONV* data and the corresponding *UNI* ground truth data.

For a given dataset  $p$ , let  $M_{DUO,p}$  and  $M_{UNI,p}$  denote the matrices of the estimated gene intensities for  $G = 976$  genes (rows) and  $S = 384$  experiments (columns) under DUO and UNI detection. Compute the Spearman rank correlation matrix,  $\rho$ , between the rows of these matrices and take the median of the diagonal elements of the resulting matrix (i.e., the values corresponding to the matched experiments between UNI and DUO) to compute the median correlation per dataset,

$$COR_p = \text{median}(\text{diag}(\rho(M_{DUO,p}, M_{UNI,p}))).$$

The second component of the scoring function is based on the Area Under the receiver operating characteristic Curve (AUC) that uses the competitor’s DE values at various thresholds to predict the UNI’s DE values being higher than 2 (“high”) or lower than -2 (“low”).

For a given dataset  $p$ , let  $AUC_{p,c}$  denote the corresponding area under the curve where  $c = \{\text{high}, \text{low}\}$ ; then, compute the arithmetic mean of the area under the curve per class to obtain the corresponding score per dataset:

$$AUC_p = (AUC_{p,\text{high}} + AUC_{p,\text{low}})/2.$$

These accuracy components were integrated into a single aggregate scores:

$$\text{SCORE} = \text{SCORE}_{\text{max}} \cdot (\max(\text{COR}_p, 0))^2 \cdot \text{AUC}_p \cdot \exp(-T_{\text{solution}}/(3 \cdot T_{\text{benchmark}})),$$

where  $T_{\text{solution}}$  is the run time for deconvoluting the data in each plate, and  $T_{\text{benchmark}}$  is the deconvolution time required by the benchmark dpeak implementation.

## A.6 Extreme modulations

[Table 3 about here.]

## References

Subramanian,A. *et al.* (2017) A next generation connectivity map: L1000 platform and the first 1,000,000 profiles. *Cell*, **171**, 1437–1452.

**Table 1:** *list of compound treatments*

| pert_iname           | pert_id       | pert_itime | pert_idose | num_replicates |
|----------------------|---------------|------------|------------|----------------|
| abiraterone(cb-7598) | BRD-K50071428 | 24 h       | 10 um      | 11             |
| acalabrutinib        | BRD-K64034691 | 24 h       | 10 um      | 11             |
| afatinib             | BRD-K66175015 | 24 h       | 10 um      | 11             |
| artesanate           | BRD-K54634444 | 24 h       | 10 um      | 11             |
| azithromycin         | BRD-K74501079 | 24 h       | 10 um      | 11             |
| diprolene            | BRD-K58148589 | 24 h       | 10 um      | 11             |
| CGS-21680            | BRD-A81866333 | 24 h       | 10 um      | 11             |
| chelidonine          | BRD-K32828673 | 24 h       | 10 um      | 11             |
| clobetasol           | BRD-K84443303 | 24 h       | 10 um      | 11             |
| digoxin              | BRD-A91712064 | 24 h       | 10 um      | 11             |
| disulfiram           | BRD-K32744045 | 24 h       | 10 um      | 10             |
| emetine hcl          | BRD-A77414132 | 24 h       | 10 um      | 10             |
| eplerenone           | BRD-K19761926 | 24 h       | 10 um      | 11             |
| epothilone-a         | BRD-K71823332 | 24 h       | 10 um      | 9              |
| flumetasone          | BRD-K61496577 | 24 h       | 10 um      | 11             |
| fluocinolone         | BRD-K94353609 | 24 h       | 10 um      | 11             |
| genipin              | BRD-K28824103 | 24 h       | 10 um      | 11             |
| hydrocortisone       | BRD-K93568044 | 24 h       | 10 um      | 10             |
| hyoscyamine          | BRD-K40530731 | 24 h       | 10 um      | 11             |
| indirubin            | BRD-K17894950 | 24 h       | 10 um      | 10             |
| L-745870             | BRD-K05528470 | 24 h       | 10 um      | 10             |
| nTZDpa               | BRD-K54708045 | 24 h       | 10 um      | 11             |
| oligomycin-a         | BRD-A81541225 | 24 h       | 10 um      | 11             |
| PRIMA1               | BRD-K15318909 | 24 h       | 10 um      | 11             |
| RITA                 | BRD-K00317371 | 24 h       | 10 um      | 11             |
| spironolactone       | BRD-K90027355 | 24 h       | 10 um      | 11             |
| tanespimycin         | BRD-K81473043 | 24 h       | 10 um      | 11             |
| tretinoin            | BRD-K71879491 | 24 h       | 10 um      | 10             |
| UB-165               | BRD-A14574269 | 24 h       | 10 um      | 11             |
| ursolic-acid         | BRD-K68185022 | 24 h       | 10 um      | 11             |
| WAY-161503           | BRD-A62021152 | 24 h       | 10 um      | 11             |
| ZM-39923             | BRD-K40624912 | 24 h       | 10 um      | 11             |

**Table 2:** *list of shRNA treatments*

| pert_iname   | pert_id        | num_replicates |
|--------------|----------------|----------------|
| ABCB6        | TRCN0000060320 | 4              |
| ADI1         | TRCN0000052275 | 4              |
| ALDOA        | TRCN0000052504 | 4              |
| ANXA7        | TRCN0000056304 | 4              |
| ARHGAP1      | TRCN0000307776 | 4              |
| ASAH1        | TRCN0000029402 | 4              |
| ATMIN        | TRCN0000141397 | 4              |
| ATP2C1       | TRCN0000043279 | 4              |
| B3GNT1       | TRCN0000035909 | 4              |
| BAX          | TRCN0000033471 | 4              |
| BIRC5        | TRCN0000073718 | 4              |
| BLCAP        | TRCN0000161355 | 4              |
| BLVRA        | TRCN0000046391 | 4              |
| BNIP3L       | TRCN0000007847 | 4              |
| CALU         | TRCN0000053792 | 4              |
| CCDC85B      | TRCN0000242754 | 4              |
| CCND1        | TRCN0000040038 | 4              |
| CD97         | TRCN0000008234 | 4              |
| CHMP4A       | TRCN0000150154 | 4              |
| CNOT4        | TRCN0000015216 | 4              |
| DDR1         | TRCN0000000618 | 4              |
| DDX10        | TRCN0000218747 | 4              |
| DECR1        | TRCN0000046516 | 4              |
| DNM1L        | TRCN0000001097 | 3              |
| ECH1         | TRCN0000052455 | 4              |
| EIF4EBP1     | TRCN0000040206 | 4              |
| EMPTY_VECTOR | TRCN0000208001 | 15             |
| ETFB         | TRCN0000064432 | 4              |
| FDFT1        | TRCN0000036327 | 4              |
| GALE         | TRCN0000049461 | 4              |
| GFP          | TRCN0000072181 | 16             |
| GRN          | TRCN0000115978 | 4              |
| GTPBP8       | TRCN0000343727 | 4              |
| HDGFRP3      | TRCN0000107348 | 4              |
| HIST1H2BK    | TRCN0000106710 | 4              |
| IKBKAP       | TRCN0000037871 | 4              |
| INPP4B       | TRCN0000230838 | 4              |
| INSIG1       | TRCN0000134159 | 4              |
| ITFG1        | TRCN0000343702 | 3              |
| JMJD6        | TRCN0000063340 | 4              |
| LBR          | TRCN0000060460 | 4              |
| LGMN         | TRCN0000029255 | 4              |

| pert_iname     | pert_id        | num_replicates |
|----------------|----------------|----------------|
| LPGAT1         | TRCN0000116066 | 4              |
| LSM6           | TRCN0000074719 | 4              |
| MAPKAPK2       | TRCN0000002285 | 4              |
| MAPKAPK3       | TRCN0000006154 | 4              |
| MAPKAPK5       | TRCN0000000684 | 4              |
| MIF            | TRCN0000056818 | 4              |
| MRPL12         | TRCN0000072655 | 4              |
| NT5DC2         | TRCN0000350758 | 4              |
| NUP88          | TRCN0000145079 | 4              |
| PARP2          | TRCN0000007933 | 4              |
| PLCB3          | TRCN0000000431 | 4              |
| POLE2          | TRCN0000233181 | 4              |
| PPIE           | TRCN0000049371 | 4              |
| PRKAG2         | TRCN0000003146 | 4              |
| PSMB10         | TRCN0000010833 | 4              |
| PTPN6          | TRCN0000011052 | 4              |
| RAB11FIP2      | TRCN0000322640 | 4              |
| RALB           | TRCN0000072956 | 4              |
| RHEB           | TRCN0000010425 | 3              |
| RNF167         | TRCN0000004100 | 4              |
| RPN1           | TRCN0000072588 | 4              |
| SLC25A4        | TRCN0000044967 | 4              |
| SNX11          | TRCN0000127684 | 4              |
| STK25          | TRCN0000006270 | 4              |
| STUB1          | TRCN0000007525 | 4              |
| STXBP1         | TRCN0000147480 | 4              |
| SYPL1          | TRCN0000059926 | 4              |
| TATDN2         | TRCN0000049828 | 4              |
| TM9SF3         | TRCN0000059371 | 4              |
| TMEM110        | TRCN0000127960 | 4              |
| TMEM50A        | TRCN0000129223 | 4              |
| trcn0000014632 | TRCN0000014632 | 4              |
| trcn0000040123 | TRCN0000040123 | 4              |
| trcn0000220641 | TRCN0000220641 | 4              |
| trcn0000221408 | TRCN0000221408 | 4              |
| trcn0000221644 | TRCN0000221644 | 4              |
| TSKU           | TRCN0000005222 | 4              |
| UGDH           | TRCN0000028108 | 4              |
| USP14          | TRCN0000007428 | 4              |
| USP6NL         | TRCN0000253832 | 4              |
| VAT1           | TRCN0000038193 | 4              |
| VDAC1          | TRCN0000029126 | 4              |
| WIPF2          | TRCN0000029833 | 4              |
| YME1L1         | TRCN0000073864 | 4              |

| pert_iname | pert_id        | num_replicates |
|------------|----------------|----------------|
| ZW10       | TRCN0000155335 | 4              |



**Table 3:** *Detection of extreme modulation of gene expression*

| rank | method                  | Extremely modulated genes |                 |                 |
|------|-------------------------|---------------------------|-----------------|-----------------|
|      |                         | True positives            | False positives | Total positives |
| 1    | random forest regressor | 37002                     | 26826           | 63828           |
| 2    | Gaussian mixture model  | <b>37410</b>              | 30137           | 67547           |
| 3    | modified k-means        | 34975                     | <b>26376</b>    | <b>61351</b>    |
| 4    | ConvNet                 | 36328                     | 35832           | 72160           |
| 5    | Gaussian mixture model  | 36731                     | 37375           | <b>74106</b>    |
| 6    | modified k-means        | <b>34944</b>              | 27345           | 62289           |
| 7    | boosted tree regressor  | 35498                     | 31664           | 67162           |
| 8    | modified k-means        | 35654                     | 27362           | 63016           |
| 9    | other                   | 35640                     | <b>37447</b>    | 73087           |
| BM   | k-means                 | 35111                     | 37050           | 72161           |

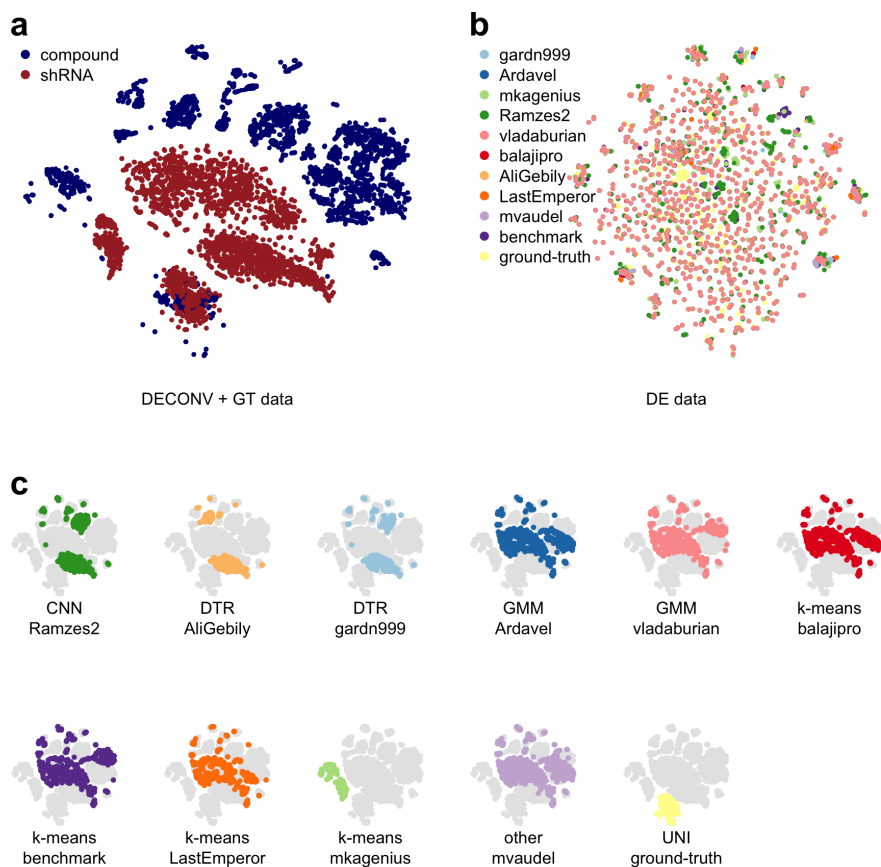

**Figure 1:** *t-SNE* projection of deconvolution and differential expression data; both include the raw and differential expression data for the ground truth (UNI). Projections are colored and subset to generate the following panels: a, ground truth and deconvolution data colored by perturbation type (compound or shRNA treatment); b, differential expression data colored by competitor's name with benchmark and ground-truth as well; c, deconvolution data colored by competitor's name, with abbreviations for the algorithm type (Convolutional Neural Network, Decision Tree Regressor, Gaussian Mixed Model, K-means, other)
